# Supplementary material for: Metaphor and gender: are words associated with source domains perceived in a gendered way?
Source: publisher site journal article supplement (doi:10.1515/lingvan-2024-0021), 2024-07-11
Supplement: Supplementary file 1 [file j_lingvan-2024-0021_suppl_002.pdf]

## **Supplementary Materials to**

Metaphor and Gender: Are Words Associated with Source Domains Perceived in a Gendered Way?

Authored by Kathleen Ahrens, Winnie Huiheng Zeng, Christian Burgers, and Chu-Ren Huang

|                                                                              |           |
|------------------------------------------------------------------------------|-----------|
| Appendix A: Order of stimuli presentation after randomization                | pp. 2-3   |
| Appendix B: Screenshots of the sample survey scales in Studies 1 to 3        | p. 4      |
| Appendix C: Numbers of participants split by de/selection criteria           | pp. 5-6   |
| Appendix D: Power analysis results                                           | p. 7      |
| Appendix E: t-tests for source domains in Studies 1-3                        | pp. 8-13  |
| Appendix F: Means (and Standard Deviations) across domains (Studies 1-3)     | p. 14     |
| Appendix G: Fixed-effects & variance–covariance estimates (Studies 1-3)      | pp. 15-17 |
| Appendix H. Lists of means of perceived masculinity/femininity (Studies 1-3) | pp. 18-26 |

### Appendix A: Order of stimuli presentation after randomization

| Order | Stimuli items       |
|-------|---------------------|
| 1     | <i>building</i>     |
| 2     | <i>warrior</i>      |
| 3     | <i>seed</i>         |
| 4     | <i>root</i>         |
| 5     | <i>direction</i>    |
| 6     | <i>boy</i>          |
| 7     | <i>sport</i>        |
| 8     | <i>framework</i>    |
| 9     | <i>game</i>         |
| 10    | <i>blossom</i>      |
| 11    | <i>championship</i> |
| 12    | <i>combat</i>       |
| 13    | <i>plant</i>        |
| 14    | <i>road</i>         |
| 15    | <i>competition</i>  |
| 16    | <i>path</i>         |
| 17    | <i>girl</i>         |
| 18    | <i>architecture</i> |
| 19    | <i>enemy</i>        |
| 20    | <i>medalist</i>     |
| 21    | <i>race</i>         |
| 22    | <i>construction</i> |
| 23    | <i>destination</i>  |
| 24    | <i>battle</i>       |
| 25    | <i>team</i>         |
| 26    | <i>foundation</i>   |
| 27    | <i>cultivate</i>    |
| 28    | <i>man</i>          |
| 29    | <i>progress</i>     |
| 30    | <i>military</i>     |
| 31    | <i>buttress</i>     |
| 32    | <i>fruit</i>        |
| 33    | <i>route</i>        |
| 34    | <i>support</i>      |
| 35    | <i>war</i>          |
| 36    | <i>sprout</i>       |
| 37    | <i>journey</i>      |
| 38    | <i>rivalry</i>      |
| 39    | <i>woman</i>        |

|    |                   |
|----|-------------------|
| 40 | <i>contest</i>    |
| 41 | <i>roof</i>       |
| 42 | <i>army</i>       |
| 43 | <i>fertilize</i>  |
| 44 | <i>assault</i>    |
| 45 | <i>wall</i>       |
| 46 | <i>trip</i>       |
| 47 | <i>weapon</i>     |
| 48 | <i>reap</i>       |
| 49 | <i>tournament</i> |
| 50 | <i>lady</i>       |
| 51 | <i>structure</i>  |
| 52 | <i>skirmish</i>   |
| 53 | <i>travel</i>     |
| 54 | <i>harvest</i>    |
| 55 | <i>way</i>        |

## Appendix B: Screenshots of the sample survey scales in Studies 1 to 3

**Strength of Association with Masculinity**

*warrior*

Weakly Associated 1 2 3 4 5 6 7 Strongly Associated I do not know the word 8



Screenshot of Survey 1

**Strength of Association with Femininity**

*warrior*

Weakly Associated 1 2 3 4 5 6 7 Strongly Associated I do not know the word 8



Screenshot of Survey 2

**Strength of Association with Masculinity or Femininity**

*warrior*

Strongly Associated with Masculinity 1 2 3 4 5 6 7 Strongly Associated with Femininity I do not know the word 8



Screenshot of Survey 3

### **Appendix C: Numbers of participants split by de/selection criteria**

In Survey 1, 538 participants were recruited. We then selected them based on the following criteria:

- Participants who completed the entire questionnaire, 507 remained.
- Participants who reported a US nationality, 507 remained.
- Participants who identified as either male or female, 506 remained.

Then, out of the 506 participants, we further selected according to the following criteria:

- (a) Excluded participants who had missing values on at least one of the attention check items (man, boy, girl, lady, woman), indicating that they did not know these (standard) English words, 489 remained.
- (b) Excluded participants who had an  $SD < 1$  on the five attention check items combined (man, boy, girl, lady, woman), indicating that they did not differentiate between explicitly male and female labels, 253 remained.
- (c) Excluded those who scored the mean of the masculine words (man, boy) lower on masculinity than the mean of the feminine words (lady, girl, woman), 228 remained.

Therefore, Survey 1 had a total of 228 participants who met all the inclusion criteria.

In Survey 2, 537 participants were recruited. We then selected them based on the following criteria:

- Participants who completed the entire questionnaire, 501 remained.
- Participants who reported a US nationality, 500 remained.
- Participants who identified as either male or female, 500 remained.

Then, out of the 500 participants, we further selected according to the following criteria:

- (a) Excluded participants who had missing values on at least one of the attention check items (man, boy, girl, lady, woman), indicating that they did not know these (standard) English words, 482 remained.
- (b) Excluded participants who had an  $SD < 1$  on the five attention check items combined (man, boy, girl, lady, woman), indicating that they did not differentiate between explicitly male and female labels, 378 remained.
- (c) Excluded those who scored the mean of the masculine words (man, boy) lower on masculinity than the mean of the feminine words (lady, girl, woman), 354 remained.

Therefore, Survey 2 had a total of 354 participants who met all the inclusion criteria.

In Survey 3, 593 participants were recruited. We then selected them based on the following criteria:

- Participants who completed the entire questionnaire, 546 remained.
- Participants who reported a US nationality, 544 remained.
- Participants who identified as either male or female, 541 remained.

Then, out of the 541 participants, we further selected according to the following criteria:

(a) Excluded participants who had missing values on at least one of the attention check items (man, boy, girl, lady, woman), indicating that they did not know these (standard) English words, 533 remained.

(b) Excluded participants who had an  $SD < 1$  on the five attention check items combined (man, boy, girl, lady, woman), indicating that they did not differentiate between explicitly male and female labels, 490 remained.

(c) Excluded those who scored the mean of the masculine words (man, boy) lower on masculinity than the mean of the feminine words (lady, girl, woman), 478 remained.

Therefore, Survey 3 had a total of 478 participants who met all the inclusion criteria.

## Appendix D: Power analysis results

### Study 1

```
> powerSim(masculinity.model3, fcompare(~ source_domain + gender, "lr"), nsim=1000)
Power for model comparison, (95% confidence interval):=====|
100.0% (99.63, 100.0)

Test: Likelihood ratio
      Comparison to ~source_domain + gender + [re]

Based on 1000 simulations, (5 warnings, 0 errors)
alpha = 0.05, nrow = 11263

Time elapsed: 0 h 10 m 19 s

nb: result might be an observed power calculation
Warning message:
In observedPowerWarning(sim) :
  This appears to be an "observed power" calculation
```

### Study 2

```
> powerSim(Femininity.model3, fcompare(~ source_domain + gender, "lr"), nsim=1000)
Power for model comparison, (95% confidence interval):=====|
91.70% (89.81, 93.34)

Test: Likelihood ratio
      Comparison to ~source_domain + gender + [re]

Based on 1000 simulations, (12 warnings, 0 errors)
alpha = 0.05, nrow = 17523

Time elapsed: 0 h 16 m 43 s

nb: result might be an observed power calculation
Warning message:
In observedPowerWarning(sim) :
  This appears to be an "observed power" calculation
> |
```

### Study 3

```
> powerSim(MasculinityorFemininity.model3, fcompare(~ source_domain + gender, "lr"), nsim=1000)
Power for model comparison, (95% confidence interval):=====|
99.50% (98.84, 99.84)

Test: Likelihood ratio
      Comparison to ~source_domain + gender + [re]

Based on 1000 simulations, (28 warnings, 0 errors)
alpha = 0.05, nrow = 22681

Time elapsed: 0 h 18 m 20 s

nb: result might be an observed power calculation
Warning message:
In observedPowerWarning(sim) :
  This appears to be an "observed power" calculation
> |
```

## Appendix E: t-tests for source domains in Studies 1-3

### t-test for Study 1

Source domain: WAR

```
>
> #T-test
> SD_WAR_Study_1 = Survey_1 %>% filter(source_domain=="War")
> Mean_WAR = SD_WAR_Study_1$masculinity
> t.test_WAR_Study1 = t.test(Mean_WAR, mu=4)
> t.test_WAR_Study1
```

One Sample t-test

```
data: Mean_WAR
t = 42.601, df = 2243, p-value < 2.2e-16
alternative hypothesis: true mean is not equal to 4
95 percent confidence interval:
 5.472614 5.614730
sample estimates:
mean of x
 5.543672
```

Source domain: PLANT

```
>
> #T-test
> SD_PLANT_Study_1 = Survey_1 %>% filter(source_domain=="Plant")
> Mean_PLANT = SD_PLANT_Study_1$masculinity
> t.test_PLANT_Study1 = t.test(Mean_PLANT, mu=4)
> t.test_PLANT_Study1
```

One Sample t-test

```
data: Mean_PLANT
t = -18.649, df = 2252, p-value < 2.2e-16
alternative hypothesis: true mean is not equal to 4
95 percent confidence interval:
 3.172482 3.329959
sample estimates:
mean of x
 3.251221
```

Source domain: JOURNEY

```
> #T-test
> SD_JOURNEY_Study_1 = Survey_1 %>% filter(source_domain=="Journey")
> Mean_JOURNEY = SD_JOURNEY_Study_1$masculinity
> t.test_JOURNEY_Study1 = t.test(Mean_JOURNEY, mu=4)
> t.test_JOURNEY_Study1
```

One Sample t-test



data: Mean\_JOURNEY  
t = -10.731, df = 2261, p-value < 2.2e-16  
alternative hypothesis: true mean is not equal to 4  
95 percent confidence interval:  
3.487059 3.645567  
sample estimates:  
mean of x  
3.566313

Source domain: COMPETITION

```
>  
> #T-test  
> SD_COMPETITION_Study_1 = Survey_1 %>% filter(source_domain=="Competition")  
> Mean_COMPETITION = SD_COMPETITION_Study_1$masculinity  
> t.test_COMPETITION_Study1 = t.test(Mean_COMPETITION, mu=4)  
> t.test_COMPETITION_Study1
```

#### One Sample t-test

data: Mean\_COMPETITION  
t = 24.226, df = 2266, p-value < 2.2e-16  
alternative hypothesis: true mean is not equal to 4  
95 percent confidence interval:  
4.829055 4.975092  
sample estimates:  
mean of x  
4.902073

Source domain: BUILDING

```
>  
> #T-test  
> SD_BUILDING_Study_1 = Survey_1 %>% filter(source_domain=="Building")  
> Mean_BUILDING = SD_BUILDING_Study_1$masculinity  
> t.test_BUILDING_Study1 = t.test(Mean_BUILDING, mu=4)  
> t.test_BUILDING_Study1
```

#### One Sample t-test

data: Mean\_BUILDING  
t = 3.6765, df = 2236, p-value = 0.000242  
alternative hypothesis: true mean is not equal to 4  
95 percent confidence interval:  
4.073422 4.241285  
sample estimates:  
mean of x  
4.157354

## **t-test for Study 2**

Source domain: WAR

```
> #T-test
> SD_WAR_Study_2 = Survey_2 %>% filter(source_domain=="War")
> Mean_WAR = SD_WAR_Study_2$Femininity
> t.test_WAR_Study2 = t.test(Mean_WAR, mu=4)
> t.test_WAR_Study2
```

### One Sample t-test

```
data: Mean_WAR
t = -52.947, df = 3501, p-value < 2.2e-16
alternative hypothesis: true mean is not equal to 4
95 percent confidence interval:
 2.384045 2.499451
sample estimates:
mean of x
 2.441748
```

Source domain: PLANT

```
> #T-test
> SD_PLANT_Study_2 = Survey_2 %>% filter(source_domain=="Plant")
> Mean_PLANT = SD_PLANT_Study_2$Femininity
> t.test_PLANT_Study2 = t.test(Mean_PLANT, mu=4)
> t.test_PLANT_Study2
```

### One Sample t-test

```
data: Mean_PLANT
t = 17.237, df = 3509, p-value < 2.2e-16
alternative hypothesis: true mean is not equal to 4
95 percent confidence interval:
 4.486810 4.611766
sample estimates:
mean of x
 4.549288
```

Source domain: JOURNEY

```
>
> #T-test
> SD_JOURNEY_Study_2 = Survey_2 %>% filter(source_domain=="Journey")
> Mean_JOURNEY = SD_JOURNEY_Study_2$Femininity
> t.test_JOURNEY_Study2 = t.test(Mean_JOURNEY, mu=4)
> t.test_JOURNEY_Study2
```

### One Sample t-test

data: Mean\_JOURNEY  
t = -15.353, df = 3531, p-value < 2.2e-16  
alternative hypothesis: true mean is not equal to 4  
95 percent confidence interval:  
3.477653 3.595960  
sample estimates:  
mean of x  
3.536806

#### Source domain: COMPETITION

```
> #T-test  
> SD_COMPETITION_Study_2 = Survey_2 %>% filter(source_domain=="Competition")  
> Mean_COMPETITION = SD_COMPETITION_Study_2$Femininity  
> t.test_COMPETITION_Study2 = t.test(Mean_COMPETITION, mu=4)  
> t.test_COMPETITION_Study2
```

### One Sample t-test

data: Mean\_COMPETITION  
t = -18.467, df = 3526, p-value < 2.2e-16  
alternative hypothesis: true mean is not equal to 4  
95 percent confidence interval:  
3.372114 3.492644  
sample estimates:  
mean of x  
3.432379

#### Source domain: BUILDING

```
>  
> #T-test  
> SD_BUILDING_Study_2 = Survey_2 %>% filter(source_domain=="Building")  
> Mean_BUILDING = SD_BUILDING_Study_2$Femininity  
> t.test_BUILDING_Study2 = t.test(Mean_BUILDING, mu=4)  
> t.test_BUILDING_Study2
```

### One Sample t-test

data: Mean\_BUILDING  
t = -19.776, df = 3451, p-value < 2.2e-16  
alternative hypothesis: true mean is not equal to 4  
95 percent confidence interval:  
3.268937 3.400819  
sample estimates:  
mean of x  
3.334878

### **t-test for Study 3**

Source domain: WAR

```
> #T-test  
> SD_WAR_Study_3 = Survey_3 %>% filter(source_domain=="War")  
> Mean_WAR = SD_WAR_Study_3$MasculinityorFemininity  
> t.test_WAR_Study3 = t.test(Mean_WAR, mu=4)  
> t.test_WAR_Study3
```

One Sample t-test

```
data: Mean_WAR  
t = -79.963, df = 4698, p-value < 2.2e-16  
alternative hypothesis: true mean is not equal to 4  
95 percent confidence interval:  
2.326411 2.406511  
sample estimates:  
mean of x  
2.366461
```

Source domain: PLANT

```
>  
> #T-test  
> SD_PLANT_Study_3 = Survey_3 %>% filter(source_domain=="Plant")  
> Mean_PLANT = SD_PLANT_Study_3$MasculinityorFemininity  
> t.test_PLANT_Study3 = t.test(Mean_PLANT, mu=4)  
> t.test_PLANT_Study3
```

One Sample t-test

```
data: Mean_PLANT  
t = 38.388, df = 4467, p-value < 2.2e-16  
alternative hypothesis: true mean is not equal to 4  
95 percent confidence interval:  
4.785819 4.870403  
sample estimates:  
mean of x  
4.828111
```

Source domain: JOURNEY

```
>  
> #T-test  
> SD_JOURNEY_Study_3 = Survey_3 %>% filter(source_domain=="Journey")  
> Mean_JOURNEY = SD_JOURNEY_Study_3$MasculinityorFemininity  
> t.test_JOURNEY_Study3 = t.test(Mean_JOURNEY, mu=4)  
> t.test_JOURNEY_Study3
```

### One Sample t-test

data: Mean\_JOURNEY  
t = 8.7992, df = 4686, p-value < 2.2e-16  
alternative hypothesis: true mean is not equal to 4  
95 percent confidence interval:  
4.108115 4.170102  
sample estimates:  
mean of x  
4.139108

Source domain: COMPETITION

```
>  
> #T-test  
> SD_COMPETITION_Study_3 = Survey_3 %>% filter(source_domain=="Competition")  
> Mean_COMPETITION = SD_COMPETITION_Study_3$MasculinityorFemininity  
> t.test_COMPETITION_Study3 = t.test(Mean_COMPETITION, mu=4)  
> t.test_COMPETITION_Study3
```

### One Sample t-test

data: Mean\_COMPETITION  
t = -28.942, df = 4249, p-value < 2.2e-16  
alternative hypothesis: true mean is not equal to 4  
95 percent confidence interval:  
3.392268 3.469379  
sample estimates:  
mean of x  
3.430824

Source domain: BUILDING

```
>  
> #T-test  
> SD_BUILDING_Study_3 = Survey_3 %>% filter(source_domain=="Building")  
> Mean_BUILDING = SD_BUILDING_Study_3$MasculinityorFemininity  
> t.test_BUILDING_Study3 = t.test(Mean_BUILDING, mu=4)  
> t.test_BUILDING_Study3
```

### One Sample t-test

data: Mean\_BUILDING  
t = -17.006, df = 4576, p-value < 2.2e-16  
alternative hypothesis: true mean is not equal to 4  
95 percent confidence interval:  
3.571869 3.660379  
sample estimates:  
mean of x  
3.616124

**Appendix F: Means (and Standard Deviations) of perceived masculinity and perceived femininity across domains (Studies 1-3)**

|                                         | WAR         | BUILDING    | COMPETITION | JOURNEY     | PLANT       |
|-----------------------------------------|-------------|-------------|-------------|-------------|-------------|
| <b>Perceived masculinity (Study 1)</b>  |             |             |             |             |             |
| Men                                     | 5.61 (1.63) | 4.35 (1.92) | 5.03 (1.65) | 3.81 (1.83) | 3.48 (1.85) |
| Women                                   | 5.43 (1.84) | 3.84 (2.15) | 4.70 (1.94) | 3.16 (2.00) | 2.88 (1.93) |
| Total                                   | 5.54 (1.72) | 4.16 (2.02) | 4.90 (1.77) | 3.57 (1.92) | 3.25 (1.91) |
| <b>Perceived femininity (Study 2)</b>   |             |             |             |             |             |
| Men                                     | 2.35 (1.70) | 3.27 (1.91) | 3.31 (1.78) | 3.36 (1.71) | 4.37 (1.87) |
| Women                                   | 2.53 (1.78) | 3.40 (2.03) | 3.55 (1.86) | 3.70 (1.85) | 4.71 (1.89) |
| Total                                   | 2.44 (1.74) | 3.33 (1.98) | 3.43 (1.83) | 3.54 (1.79) | 4.55 (1.89) |
| <b>Masculinity-Femininity (Study 3)</b> |             |             |             |             |             |
| Men                                     | 2.25 (1.38) | 3.65 (1.58) | 3.36 (1.30) | 3.99 (1.14) | 4.86 (1.52) |
| Women                                   | 2.45 (1.41) | 3.65 (1.54) | 3.50 (1.25) | 4.25 (1.04) | 4.99 (1.45) |
| Total                                   | 2.37 (1.40) | 3.65 (1.56) | 3.44 (1.27) | 4.15 (1.09) | 4.94 (1.48) |

*Note: All variables were measured on a scale from 1 to 7, with 7 indicating that the domain was perceived as more masculine (Study 1) or more feminine (Studies 2-3).*

**Appendix G (1): Fixed-effects estimates and variance–covariance estimates for the models predicting perceived masculinity (SD = Source domain; Est. = Estimates) – Study 1**

| <i>Predictors</i>                                    | masculinity   |              |          | <i>Est.</i>   | masculinity   |              |               | <i>Est.</i>   | masculinity |               |               | <i>Est.</i> | masculinity   |               |          |
|------------------------------------------------------|---------------|--------------|----------|---------------|---------------|--------------|---------------|---------------|-------------|---------------|---------------|-------------|---------------|---------------|----------|
|                                                      | <i>Est.</i>   | <i>99%CI</i> | <i>p</i> |               | <i>Est.</i>   | <i>99%CI</i> | <i>p</i>      |               | <i>Est.</i> | <i>99%CI</i>  | <i>p</i>      |             | <i>Est.</i>   | <i>99%CI</i>  | <i>p</i> |
| (Intercept)                                          | 4.28          | 3.87 – 4.70  | <0.001   | 5.53          | 5.04 – 6.01   | <0.001       | 5.25          | 4.70 – 5.79   | <0.001      | 5.41          | 4.86 – 5.96   | <0.001      | 5.4           | 4.88 – 5.93   | <0.001   |
| SD [Competition]                                     |               |              |          | -0.63         | -1.26 – 0.00  | 0.01         | -0.63         | -1.26 – 0.00  | 0.01        | -0.71         | -1.36 – -0.07 | 0.004       | -0.71         | -1.39 – -0.03 | 0.007    |
| SD [Building]                                        |               |              |          | -1.37         | -2.00 – -0.74 | <0.001       | -1.37         | -2.00 – -0.74 | <0.001      | -1.57         | -2.22 – -0.93 | <0.001      | -1.57         | -2.28 – -0.86 | <0.001   |
| SD [Journey]                                         |               |              |          | -1.96         | -2.59 – -1.33 | <0.001       | -1.96         | -2.59 – -1.33 | <0.001      | -2.24         | -2.89 – -1.60 | <0.001      | -2.24         | -2.98 – -1.49 | <0.001   |
| SD [Plant]                                           |               |              |          | -2.27         | -2.90 – -1.64 | <0.001       | -2.27         | -2.90 – -1.64 | <0.001      | -2.52         | -3.16 – -1.88 | <0.001      | -2.51         | -3.26 – -1.77 | <0.001   |
| gender [Male]                                        |               |              |          |               |               |              | 0.46          | 0.06 – 0.86   | 0.003       | 0.19          | -0.23 – 0.61  | 0.238       | 0.19          | -0.17 – 0.55  | 0.165    |
| SD [Competition] * gender [Male]                     |               |              |          |               |               |              |               |               |             | 0.14          | -0.08 – 0.36  | 0.092       | 0.14          | -0.19 – 0.48  | 0.281    |
| SD [Building] * gender [Male]                        |               |              |          |               |               |              |               |               |             | 0.32          | 0.10 – 0.54   | <0.001      | 0.32          | -0.10 – 0.75  | 0.052    |
| SD [Journey] * gender [Male]                         |               |              |          |               |               |              |               |               |             | 0.46          | 0.24 – 0.68   | <0.001      | 0.46          | -0.06 – 0.98  | 0.022    |
| SD [Plant] * gender [Male]                           |               |              |          |               |               |              |               |               |             | 0.40          | 0.18 – 0.62   | <0.001      | 0.40          | -0.12 – 0.92  | 0.046    |
| <b>Random Effects</b>                                |               |              |          |               |               |              |               |               |             |               |               |             |               |               |          |
| $\sigma^2$                                           | 1.92          |              |          | 1.92          |               |              | 1.92          |               |             | 1.91          |               |             | 1.53          |               |          |
| $\tau_{00}$                                          | 1.30          | Participant  |          | 1.30          | Participant   |              | 1.25          | Participant   |             | 1.25          | Participant   |             | 0.90          | Participant   |          |
|                                                      | 0.99          | Target Word  |          | 0.29          | Target Word   |              | 0.29          | Target Word   |             | 0.29          | Target Word   |             | 0.30          | Target Word   |          |
| $\tau_{11}$                                          |               |              |          |               |               |              |               |               |             |               |               |             | 0.60          | Competition   |          |
|                                                      |               |              |          |               |               |              |               |               |             |               |               |             | 1.16          | Building      |          |
|                                                      |               |              |          |               |               |              |               |               |             |               |               |             | 1.88          | Journey       |          |
|                                                      |               |              |          |               |               |              |               |               |             |               |               |             | 1.89          | Plant         |          |
| $\rho_{01}$                                          |               |              |          |               |               |              |               |               |             |               |               |             | 0.02          | Competition   |          |
|                                                      |               |              |          |               |               |              |               |               |             |               |               |             | -0.13         | Building      |          |
|                                                      |               |              |          |               |               |              |               |               |             |               |               |             | -0.21         | Journey       |          |
|                                                      |               |              |          |               |               |              |               |               |             |               |               |             | -0.42         | Plant         |          |
| ICC                                                  | 0.54          |              |          | 0.45          |               |              | 0.44          |               |             | 0.45          |               |             | 0.56          |               |          |
| N                                                    | 228           | Participant  |          | 228           | Participant   |              | 228           | Participant   |             | 228           | Participant   |             | 228           | Participant   |          |
|                                                      | 50            | Target Word  |          | 50            | Target Word   |              | 50            | Target Word   |             | 50            | Target Word   |             | 50            | Target Word   |          |
| Observations                                         | 11263         |              |          | 11263         |               |              | 11263         |               |             | 11263         |               |             | 11263         |               |          |
| Marginal R <sup>2</sup> / Conditional R <sup>2</sup> | 0.000 / 0.544 |              |          | 0.167 / 0.544 |               |              | 0.178 / 0.544 |               |             | 0.180 / 0.545 |               |             | 0.179 / 0.637 |               |          |

**Appendix G (2): Fixed-effects estimates and variance–covariance estimates for the models predicting perceived masculinity (SD = Source domain; Est. = Estimates) – Study 2**

| <i>Predictors</i>                                    | <b>Femininity</b> |              |          |
|------------------------------------------------------|-------------------|--------------|----------|-------------------|--------------|----------|-------------------|--------------|----------|-------------------|--------------|----------|-------------------|--------------|----------|
|                                                      | <i>Est.</i>       | <i>99%CI</i> | <i>p</i> |
| (Intercept)                                          | 3.46              | 3.10 – 3.82  | <0.001   | 2.45              | 1.93 – 2.97  | <0.001   | 2.56              | 2.02 – 3.10  | <0.001   | 2.53              | 1.99 – 3.07  | <0.001   | 2.53              | 1.98 – 3.09  | <0.001   |
| SD [Competition]                                     |                   |              |          | 0.98              | 0.28 – 1.69  | <0.001   | 0.98              | 0.28 – 1.69  | <0.001   | 1.02              | 0.31 – 1.73  | <0.001   | 1.01              | 0.29 – 1.73  | <0.001   |
| SD [Building]                                        |                   |              |          | 0.88              | 0.18 – 1.59  | 0.001    | 0.88              | 0.18 – 1.59  | 0.001    | 0.87              | 0.16 – 1.57  | 0.002    | 0.86              | 0.14 – 1.59  | 0.002    |
| SD [Journey]                                         |                   |              |          | 1.09              | 0.39 – 1.79  | <0.001   | 1.09              | 0.39 – 1.79  | <0.001   | 1.17              | 0.46 – 1.88  | <0.001   | 1.16              | 0.43 – 1.90  | <0.001   |
| SD [Plant]                                           |                   |              |          | 2.1               | 1.40 – 2.81  | <0.001   | 2.1               | 1.40 – 2.81  | <0.001   | 2.18              | 1.47 – 2.89  | <0.001   | 2.17              | 1.42 – 2.93  | <0.001   |
| gender [Male]                                        |                   |              |          |                   |              |          | -0.24             | -0.54 – 0.06 | 0.042    | -0.17             | -0.49 – 0.15 | 0.179    | -0.17             | -0.52 – 0.19 | 0.225    |
| SD [Competition] * gender [Male]                     |                   |              |          |                   |              |          |                   |              |          | -0.07             | -0.24 – 0.10 | 0.297    | -0.07             | -0.31 – 0.17 | 0.453    |
| SD [Building] * gender [Male]                        |                   |              |          |                   |              |          |                   |              |          | 0.04              | -0.13 – 0.21 | 0.566    | 0.04              | -0.22 – 0.30 | 0.716    |
| SD [Journey] * gender [Male]                         |                   |              |          |                   |              |          |                   |              |          | -0.16             | -0.33 – 0.00 | 0.012    | -0.16             | -0.47 – 0.14 | 0.164    |
| SD [Plant] * gender [Male]                           |                   |              |          |                   |              |          |                   |              |          | -0.16             | -0.33 – 0.01 | 0.013    | -0.16             | -0.57 – 0.24 | 0.304    |
| <b>Random Effects</b>                                |                   |              |          |                   |              |          |                   |              |          |                   |              |          |                   |              |          |
| $\sigma^2$                                           | 1.86              |              |          | 1.86              |              |          | 1.86              |              |          | 1.86              |              |          | 1.52              |              |          |
| $\tau_{00}$                                          | 1.19 Participant  |              |          | 1.19 Participant  |              |          | 1.17 Participant  |              |          | 1.17 Participant  |              |          | 1.49 Participant  |              |          |
|                                                      | 0.82 Target Word  |              |          | 0.37 Target Word  |              |          |
| $\tau_{11}$                                          |                   |              |          |                   |              |          |                   |              |          |                   |              |          | 0.44 Competition  |              |          |
|                                                      |                   |              |          |                   |              |          |                   |              |          |                   |              |          | 0.59 Building     |              |          |
|                                                      |                   |              |          |                   |              |          |                   |              |          |                   |              |          | 0.91 Journey      |              |          |
|                                                      |                   |              |          |                   |              |          |                   |              |          |                   |              |          | 1.88 Plant        |              |          |
| $\rho_{01}$                                          |                   |              |          |                   |              |          |                   |              |          |                   |              |          | 0.00 Competition  |              |          |
|                                                      |                   |              |          |                   |              |          |                   |              |          |                   |              |          | -0.43 Building    |              |          |
|                                                      |                   |              |          |                   |              |          |                   |              |          |                   |              |          | -0.38 Journey     |              |          |
|                                                      |                   |              |          |                   |              |          |                   |              |          |                   |              |          | -0.62 Plant       |              |          |
| ICC                                                  | 0.52              |              |          | 0.46              |              |          | 0.45              |              |          | 0.45              |              |          | 0.55              |              |          |
| N                                                    | 354 Participant   |              |          |
|                                                      | 50 Target Word    |              |          | 50 Target Word    |              |          | 50 Target Word    |              |          | 50 Target Word    |              |          | 50 Target Word    |              |          |
| Observations                                         | 17523             |              |          | 17523             |              |          | 17523             |              |          | 17523             |              |          | 17523             |              |          |
| Marginal R <sup>2</sup> / Conditional R <sup>2</sup> | 0.000 / 0.519     |              |          | 0.116 / 0.519     |              |          | 0.120 / 0.519     |              |          | 0.120 / 0.519     |              |          | 0.119 / 0.605     |              |          |



**Appendix G (3): Fixed-effects estimates and variance–covariance estimates for the models predicting perceived masculinity/femininity (SD = Source domain; Est. = Estimates) – Study 3**

| <i>Predictors</i>                                    | Masculinity or Femininity |              |                  | Masculinity or Femininity |              |                  | Masculinity or Femininity |               |                  | Masculinity or Femininity |               |                  | Masculinity or Femininity |              |                  |
|------------------------------------------------------|---------------------------|--------------|------------------|---------------------------|--------------|------------------|---------------------------|---------------|------------------|---------------------------|---------------|------------------|---------------------------|--------------|------------------|
|                                                      | <i>Est.</i>               | <i>99%CI</i> | <i>p</i>         | <i>Est.</i>               | <i>99%CI</i> | <i>p</i>         | <i>Est.</i>               | <i>99%CI</i>  | <i>p</i>         | <i>Est.</i>               | <i>99%CI</i>  | <i>p</i>         | <i>Est.</i>               | <i>99%CI</i> | <i>p</i>         |
| (Intercept)                                          | 3.72                      | 3.35 – 4.08  | <b>&lt;0.001</b> | 2.38                      | 1.95 – 2.81  | <b>&lt;0.001</b> | 2.44                      | 2.01 – 2.87   | <b>&lt;0.001</b> | 2.46                      | 2.03 – 2.89   | <b>&lt;0.001</b> | 2.46                      | 2.01 – 2.90  | <b>&lt;0.001</b> |
| SD [Competition]                                     |                           |              |                  | 1.07                      | 0.47 – 1.66  | <b>&lt;0.001</b> | 1.07                      | 0.47 – 1.66   | <b>&lt;0.001</b> | 1.04                      | 0.44 – 1.64   | <b>&lt;0.001</b> | 1.04                      | 0.43 – 1.64  | <b>&lt;0.001</b> |
| SD [Building]                                        |                           |              |                  | 1.29                      | 0.69 – 1.88  | <b>&lt;0.001</b> | 1.29                      | 0.69 – 1.88   | <b>&lt;0.001</b> | 1.21                      | 0.61 – 1.81   | <b>&lt;0.001</b> | 1.21                      | 0.60 – 1.81  | <b>&lt;0.001</b> |
| SD [Journey]                                         |                           |              |                  | 1.77                      | 1.17 – 2.36  | <b>&lt;0.001</b> | 1.77                      | 1.17 – 2.36   | <b>&lt;0.001</b> | 1.79                      | 1.20 – 2.39   | <b>&lt;0.001</b> | 1.79                      | 1.18 – 2.40  | <b>&lt;0.001</b> |
| SD [Plant]                                           |                           |              |                  | 2.56                      | 1.96 – 3.16  | <b>&lt;0.001</b> | 2.56                      | 1.96 – 3.16   | <b>&lt;0.001</b> | 2.53                      | 1.93 – 3.13   | <b>&lt;0.001</b> | 2.53                      | 1.90 – 3.15  | <b>&lt;0.001</b> |
| gender [Male]                                        |                           |              |                  |                           |              |                  | -0.14                     | -0.27 – -0.01 | <b>0.004</b>     | -0.19                     | -0.34 – -0.04 | <b>0.001</b>     | -0.18                     | -0.41 – 0.04 | <b>0.038</b>     |
| SD [Competition] * gender [Male]                     |                           |              |                  |                           |              |                  |                           |               |                  | 0.06                      | -0.06 – 0.19  | 0.211            | 0.06                      | -0.12 – 0.23 | 0.398            |
| SD [Building] * gender [Male]                        |                           |              |                  |                           |              |                  |                           |               |                  | 0.19                      | 0.06 – 0.31   | <b>&lt;0.001</b> | 0.18                      | -0.01 – 0.37 | <b>0.012</b>     |
| SD [Journey] * gender [Male]                         |                           |              |                  |                           |              |                  |                           |               |                  | -0.06                     | -0.19 – 0.06  | 0.185            | -0.07                     | -0.30 – 0.15 | 0.395            |
| SD [Plant] * gender [Male]                           |                           |              |                  |                           |              |                  |                           |               |                  | 0.07                      | -0.06 – 0.19  | 0.169            | 0.05                      | -0.25 – 0.36 | 0.652            |
| <b>Random Effects</b>                                |                           |              |                  |                           |              |                  |                           |               |                  |                           |               |                  |                           |              |                  |
| $\sigma^2$                                           | 1.37                      |              |                  | 1.37                      |              |                  | 1.37                      |               |                  | 1.37                      |               |                  | 1.15                      |              |                  |
| $\tau_{00}$                                          | 0.25 Participant          |              |                  | 0.25 Participant          |              |                  | 0.25 Participant          |               |                  | 0.25 Participant          |               |                  | 0.79 Participant          |              |                  |
|                                                      | 0.97 Target Word          |              |                  | 0.26 Target Word          |              |                  | 0.26 Target Word          |               |                  | 0.26 Target Word          |               |                  | 0.27 Target Word          |              |                  |
| $\tau_{11}$                                          |                           |              |                  |                           |              |                  |                           |               |                  |                           |               |                  | 0.30 Competition          |              |                  |
|                                                      |                           |              |                  |                           |              |                  |                           |               |                  |                           |               |                  | 0.37 Building             |              |                  |
|                                                      |                           |              |                  |                           |              |                  |                           |               |                  |                           |               |                  | 0.64 Journey              |              |                  |
|                                                      |                           |              |                  |                           |              |                  |                           |               |                  |                           |               |                  | 1.36 Plant                |              |                  |
| $\rho_{01}$                                          |                           |              |                  |                           |              |                  |                           |               |                  |                           |               |                  | -0.63 Competition         |              |                  |
|                                                      |                           |              |                  |                           |              |                  |                           |               |                  |                           |               |                  | -0.70 Building            |              |                  |
|                                                      |                           |              |                  |                           |              |                  |                           |               |                  |                           |               |                  | -0.82 Journey             |              |                  |
|                                                      |                           |              |                  |                           |              |                  |                           |               |                  |                           |               |                  | -0.86 Plant               |              |                  |
| ICC                                                  | 0.47                      |              |                  | 0.27                      |              |                  | 0.27                      |               |                  | 0.27                      |               |                  | 0.39                      |              |                  |
| N                                                    | 478 Participant           |              |                  | 478 Participant           |              |                  | 478 Participant           |               |                  | 478 Participant           |               |                  | 478 Participant           |              |                  |
|                                                      | 50 Target Word            |              |                  | 50 Target Word            |              |                  | 50 Target Word            |               |                  | 50 Target Word            |               |                  | 50 Target Word            |              |                  |
| Observations                                         | 23457                     |              |                  | 23457                     |              |                  | 23457                     |               |                  | 23457                     |               |                  | 23457                     |              |                  |
| Marginal R <sup>2</sup> / Conditional R <sup>2</sup> | 0.000 / 0.473             |              |                  | 0.274 / 0.473             |              |                  | 0.276 / 0.473             |               |                  | 0.276 / 0.474             |               |                  | 0.275 / 0.555             |              |                  |

## Appendix H: Lists of means of perceived masculinity/femininity (Studies 1-3)

| Study 1        |                       |        |                                                 |                                        |
|----------------|-----------------------|--------|-------------------------------------------------|----------------------------------------|
| Source domains | Metaphorical keywords | Gender | Means of perceived masculinity by men and women | Overall means of perceived masculinity |
| Building       | architecture          | Female | 3.76                                            | 4.18                                   |
|                |                       | Male   | 4.44                                            |                                        |
|                | building              | Female | 5.06                                            | 5.25                                   |
|                |                       | Male   | 5.37                                            |                                        |
|                | buttress              | Female | 3.20                                            | 3.44                                   |
|                |                       | Male   | 3.58                                            |                                        |
|                | construction          | Female | 5.15                                            | 5.33                                   |
|                |                       | Male   | 5.45                                            |                                        |
|                | foundation            | Female | 3.92                                            | 4.24                                   |
|                |                       | Male   | 4.44                                            |                                        |
|                | framework             | Female | 3.57                                            | 3.88                                   |
|                |                       | Male   | 4.06                                            |                                        |
|                | roof                  | Female | 3.11                                            | 3.47                                   |
|                |                       | Male   | 3.69                                            |                                        |
|                | structure             | Female | 3.72                                            | 4.00                                   |
|                |                       | Male   | 4.16                                            |                                        |
|                | support               | Female | 3.70                                            | 4.09                                   |
|                |                       | Male   | 4.33                                            |                                        |
|                | wall                  | Female | 3.09                                            | 3.62                                   |
|                |                       | Male   | 3.94                                            |                                        |
| Competition    | championship          | Female | 5.28                                            | 5.49                                   |
|                |                       | Male   | 5.62                                            |                                        |
|                | competition           | Female | 5.06                                            | 5.29                                   |
|                |                       | Male   | 5.43                                            |                                        |
|                | contest               | Female | 4.28                                            | 4.56                                   |
|                |                       | Male   | 4.73                                            |                                        |
|                | game                  | Female | 4.37                                            | 4.68                                   |
|                |                       | Male   | 4.87                                            |                                        |
|                | medalist              | Female | 4.20                                            | 4.39                                   |
|                |                       | Male   | 4.51                                            |                                        |
|                | race                  | Female | 4.10                                            | 4.56                                   |
|                |                       | Male   | 4.84                                            |                                        |
|                | rivalry               | Female | 5.07                                            | 4.96                                   |
|                |                       | Male   | 4.89                                            |                                        |
|                | sport                 | Female | 5.56                                            | 5.60                                   |

|         |             |        |      |      |
|---------|-------------|--------|------|------|
|         | team        | Male   | 5.62 | 4.59 |
|         |             | Female | 4.35 |      |
|         |             | Male   | 4.74 |      |
|         | tournament  | Female | 4.67 | 4.89 |
|         |             | Male   | 5.03 |      |
| Journey | destination | Female | 3.34 | 3.67 |
|         |             | Male   | 3.88 |      |
|         | direction   | Female | 3.69 | 4.05 |
|         |             | Male   | 4.27 |      |
|         | journey     | Female | 3.38 | 3.79 |
|         |             | Male   | 4.04 |      |
|         | path        | Female | 2.94 | 3.41 |
|         |             | Male   | 3.69 |      |
|         | progress    | Female | 3.73 | 4.00 |
|         |             | Male   | 4.16 |      |
|         | road        | Female | 3.06 | 3.36 |
|         |             | Male   | 3.54 |      |
|         | route       | Female | 3.00 | 3.35 |
|         |             | Male   | 3.57 |      |
|         | travel      | Female | 2.93 | 3.48 |
|         |             | Male   | 3.82 |      |
|         | trip        | Female | 2.84 | 3.36 |
|         |             | Male   | 3.67 |      |
|         | way         | Female | 2.72 | 3.20 |
|         |             | Male   | 3.49 |      |
| Plant   | blossom     | Female | 2.15 | 2.56 |
|         |             | Male   | 2.80 |      |
|         | cultivate   | Female | 3.05 | 3.58 |
|         |             | Male   | 3.91 |      |
|         | fertilize   | Female | 3.08 | 3.33 |
|         |             | Male   | 3.48 |      |
|         | fruit       | Female | 2.14 | 2.52 |
|         |             | Male   | 2.76 |      |
|         | harvest     | Female | 3.18 | 3.53 |
|         |             | Male   | 3.75 |      |
|         | plant       | Female | 2.49 | 2.96 |
|         |             | Male   | 3.24 |      |
|         | reap        | Female | 2.97 | 3.40 |
|         |             | Male   | 3.67 |      |
|         | root        | Female | 3.45 | 3.76 |
|         |             | Male   | 3.95 |      |
|         | seed        | Female | 3.54 | 3.80 |

|     |          |        |      |      |
|-----|----------|--------|------|------|
|     |          | Male   | 3.96 |      |
|     | sprout   | Female | 2.72 | 3.07 |
|     |          | Male   | 3.27 |      |
| War | army     | Female | 6.09 | 6.18 |
|     |          | Male   | 6.23 |      |
|     | assault  | Female | 5.15 | 5.03 |
|     |          | Male   | 4.96 |      |
|     | battle   | Female | 5.66 | 5.74 |
|     |          | Male   | 5.79 |      |
|     | combat   | Female | 5.65 | 5.82 |
|     |          | Male   | 5.93 |      |
|     | enemy    | Female | 3.90 | 4.13 |
|     |          | Male   | 4.27 |      |
|     | military | Female | 6.00 | 6.12 |
|     |          | Male   | 6.20 |      |
|     | skirmish | Female | 3.73 | 4.05 |
|     |          | Male   | 4.24 |      |
|     | war      | Female | 6.13 | 6.22 |
|     |          | Male   | 6.28 |      |
|     | warrior  | Female | 6.33 | 6.43 |
|     |          | Male   | 6.50 |      |
|     | weapon   | Female | 5.45 | 5.51 |
|     |          | Male   | 5.54 |      |

| Study 2        |                       |        |                                                |                                       |
|----------------|-----------------------|--------|------------------------------------------------|---------------------------------------|
| Source domains | Metaphorical keywords | Gender | Means of perceived femininity by men and women | Overall means of perceived femininity |
| Building       | architecture          | Female | 2.96                                           | 3.01                                  |
| Building       | architecture          | Male   | 3.05                                           |                                       |
| Building       | building              | Female | 2.91                                           | 2.89                                  |
| Building       | building              | Male   | 2.86                                           |                                       |
| Building       | buttress              | Female | 3.17                                           | 3.22                                  |
| Building       | buttress              | Male   | 3.26                                           |                                       |
| Building       | construction          | Female | 2.34                                           | 2.31                                  |
| Building       | construction          | Male   | 2.27                                           |                                       |
| Building       | foundation            | Female | 4.65                                           | 4.43                                  |
| Building       | foundation            | Male   | 4.19                                           |                                       |
| Building       | framework             | Female | 3.49                                           | 3.43                                  |
| Building       | framework             | Male   | 3.36                                           |                                       |
| Building       | roof                  | Female | 2.40                                           | 2.45                                  |
| Building       | roof                  | Male   | 2.50                                           |                                       |
| Building       | structure             | Female | 3.77                                           | 3.57                                  |
| Building       | structure             | Male   | 3.34                                           |                                       |
| Building       | support               | Female | 5.86                                           | 5.54                                  |
| Building       | support               | Male   | 5.19                                           |                                       |
| Building       | wall                  | Female | 2.36                                           | 2.49                                  |
| Building       | wall                  | Male   | 2.63                                           |                                       |
| Competition    | championship          | Female | 3.76                                           | 3.52                                  |
| Competition    | championship          | Male   | 3.27                                           |                                       |
| Competition    | competition           | Female | 3.78                                           | 3.57                                  |
| Competition    | competition           | Male   | 3.35                                           |                                       |
| Competition    | contest               | Female | 3.43                                           | 3.33                                  |
| Competition    | contest               | Male   | 3.22                                           |                                       |
| Competition    | game                  | Female | 3.29                                           | 3.26                                  |
| Competition    | game                  | Male   | 3.23                                           |                                       |
| Competition    | medalist              | Female | 4.03                                           | 3.85                                  |
| Competition    | medalist              | Male   | 3.66                                           |                                       |
| Competition    | race                  | Female | 3.37                                           | 3.32                                  |
| Competition    | race                  | Male   | 3.27                                           |                                       |
| Competition    | rivalry               | Female | 2.97                                           | 2.96                                  |
| Competition    | rivalry               | Male   | 2.95                                           |                                       |
| Competition    | sport                 | Female | 3.55                                           | 3.49                                  |
| Competition    | sport                 | Male   | 3.41                                           |                                       |

|             |             |        |      |      |
|-------------|-------------|--------|------|------|
| Competition | team        | Female | 4.26 | 4.11 |
| Competition | team        | Male   | 3.95 |      |
| Competition | tournament  | Female | 3.01 | 2.90 |
| Competition | tournament  | Male   | 2.77 |      |
| Journey     | destination | Female | 3.64 | 3.50 |
| Journey     | destination | Male   | 3.35 |      |
| Journey     | direction   | Female | 3.94 | 3.81 |
| Journey     | direction   | Male   | 3.67 |      |
| Journey     | journey     | Female | 4.55 | 4.21 |
| Journey     | journey     | Male   | 3.84 |      |
| Journey     | path        | Female | 4.07 | 3.86 |
| Journey     | path        | Male   | 3.62 |      |
| Journey     | progress    | Female | 4.47 | 4.29 |
| Journey     | progress    | Male   | 4.09 |      |
| Journey     | road        | Female | 2.67 | 2.60 |
| Journey     | road        | Male   | 2.54 |      |
| Journey     | route       | Female | 2.96 | 2.94 |
| Journey     | route       | Male   | 2.93 |      |
| Journey     | travel      | Female | 3.97 | 3.65 |
| Journey     | travel      | Male   | 3.31 |      |
| Journey     | trip        | Female | 3.25 | 3.16 |
| Journey     | trip        | Male   | 3.05 |      |
| Journey     | way         | Female | 3.46 | 3.34 |
| Journey     | way         | Male   | 3.22 |      |
| Plant       | blossom     | Female | 6.15 | 6.08 |
| Plant       | blossom     | Male   | 5.99 |      |
| Plant       | cultivate   | Female | 5.04 | 4.82 |
| Plant       | cultivate   | Male   | 4.58 |      |
| Plant       | fertilize   | Female | 4.98 | 4.90 |
| Plant       | fertilize   | Male   | 4.82 |      |
| Plant       | fruit       | Female | 5.13 | 4.81 |
| Plant       | fruit       | Male   | 4.46 |      |
| Plant       | harvest     | Female | 4.70 | 4.44 |
| Plant       | harvest     | Male   | 4.16 |      |
| Plant       | plant       | Female | 4.93 | 4.64 |
| Plant       | plant       | Male   | 4.32 |      |
| Plant       | reap        | Female | 3.61 | 3.44 |
| Plant       | reap        | Male   | 3.26 |      |
| Plant       | root        | Female | 4.08 | 3.97 |
| Plant       | root        | Male   | 3.85 |      |
| Plant       | seed        | Female | 4.03 | 4.08 |
| Plant       | seed        | Male   | 4.14 |      |

|       |          |        |      |      |
|-------|----------|--------|------|------|
| Plant | sprout   | Female | 4.42 | 4.28 |
| Plant | sprout   | Male   | 4.13 |      |
| War   | army     | Female | 2.27 | 2.21 |
| War   | army     | Male   | 2.14 |      |
| War   | assault  | Female | 2.46 | 2.37 |
| War   | assault  | Male   | 2.26 |      |
| War   | battle   | Female | 2.61 | 2.51 |
| War   | battle   | Male   | 2.41 |      |
| War   | combat   | Female | 2.43 | 2.32 |
| War   | combat   | Male   | 2.21 |      |
| War   | enemy    | Female | 2.45 | 2.47 |
| War   | enemy    | Male   | 2.49 |      |
| War   | military | Female | 2.55 | 2.45 |
| War   | military | Male   | 2.35 |      |
| War   | skirmish | Female | 2.51 | 2.40 |
| War   | skirmish | Male   | 2.29 |      |
| War   | war      | Female | 2.04 | 2.06 |
| War   | war      | Male   | 2.09 |      |
| War   | warrior  | Female | 3.81 | 3.47 |
| War   | warrior  | Male   | 3.09 |      |
| War   | weapon   | Female | 2.12 | 2.14 |
| War   | weapon   | Male   | 2.16 |      |

| Study 3        |                       |        |                                                            |                                                   |
|----------------|-----------------------|--------|------------------------------------------------------------|---------------------------------------------------|
| Source domains | Metaphorical keywords | Gender | Means of perceived masculinity-femininity by men and women | Overall means of perceived masculinity-femininity |
| War            | army                  | Female | 2.16                                                       | 2.09                                              |
| War            | army                  | Male   | 1.98                                                       |                                                   |
| War            | assault               | Female | 2.42                                                       | 2.44                                              |
| War            | assault               | Male   | 2.46                                                       |                                                   |
| War            | battle                | Female | 2.23                                                       | 2.17                                              |
| War            | battle                | Male   | 2.08                                                       |                                                   |
| War            | combat                | Female | 1.97                                                       | 1.94                                              |
| War            | combat                | Male   | 1.89                                                       |                                                   |
| War            | enemy                 | Female | 3.14                                                       | 3.11                                              |
| War            | enemy                 | Male   | 3.06                                                       |                                                   |
| War            | military              | Female | 2.29                                                       | 2.20                                              |
| War            | military              | Male   | 2.08                                                       |                                                   |
| War            | skirmish              | Female | 3.56                                                       | 3.38                                              |
| War            | skirmish              | Male   | 3.13                                                       |                                                   |
| War            | war                   | Female | 2.00                                                       | 1.92                                              |
| War            | war                   | Male   | 1.81                                                       |                                                   |
| War            | warrior               | Female | 2.41                                                       | 2.21                                              |
| War            | warrior               | Male   | 1.92                                                       |                                                   |
| War            | weapon                | Female | 2.39                                                       | 2.32                                              |
| War            | weapon                | Male   | 2.23                                                       |                                                   |
| Competition    | championship          | Female | 3.16                                                       | 3.11                                              |
| Competition    | championship          | Male   | 3.03                                                       |                                                   |
| Competition    | competition           | Female | 3.34                                                       | 3.22                                              |
| Competition    | competition           | Male   | 3.06                                                       |                                                   |
| Competition    | contest               | Female | 3.75                                                       | 3.65                                              |
| Competition    | contest               | Male   | 3.50                                                       |                                                   |
| Competition    | medalist              | Female | 3.90                                                       | 3.87                                              |
| Competition    | medalist              | Male   | 3.82                                                       |                                                   |
| Competition    | race                  | Female | 3.68                                                       | 3.64                                              |
| Competition    | race                  | Male   | 3.58                                                       |                                                   |
| Competition    | rivalry               | Female | 3.14                                                       | 3.10                                              |
| Competition    | rivalry               | Male   | 3.04                                                       |                                                   |
| Competition    | sport                 | Female | 3.04                                                       | 2.94                                              |
| Competition    | sport                 | Male   | 2.80                                                       |                                                   |
| Competition    | team                  | Female | 4.08                                                       | 3.99                                              |
| Competition    | team                  | Male   | 3.87                                                       |                                                   |
| Competition    | tournament            | Female | 3.35                                                       | 3.37                                              |



|             |              |        |      |      |
|-------------|--------------|--------|------|------|
| Competition | tournament   | Male   | 3.39 |      |
| Building    | architecture | Female | 3.27 | 3.31 |
| Building    | architecture | Male   | 3.37 |      |
| Building    | building     | Female | 2.65 | 2.61 |
| Building    | building     | Male   | 2.57 |      |
| Building    | buttress     | Female | 4.22 | 4.31 |
| Building    | buttress     | Male   | 4.43 |      |
| Building    | construction | Female | 2.31 | 2.29 |
| Building    | construction | Male   | 2.26 |      |
| Building    | foundation   | Female | 4.40 | 4.26 |
| Building    | foundation   | Male   | 4.04 |      |
| Building    | framework    | Female | 3.88 | 3.88 |
| Building    | framework    | Male   | 3.88 |      |
| Building    | roof         | Female | 3.32 | 3.41 |
| Building    | roof         | Male   | 3.55 |      |
| Building    | structure    | Female | 3.83 | 3.85 |
| Building    | structure    | Male   | 3.89 |      |
| Building    | support      | Female | 4.91 | 4.87 |
| Building    | support      | Male   | 4.82 |      |
| Building    | wall         | Female | 3.64 | 3.64 |
| Building    | wall         | Male   | 3.64 |      |
| Journey     | destination  | Female | 4.26 | 4.13 |
| Journey     | destination  | Male   | 3.96 |      |
| Journey     | direction    | Female | 4.18 | 4.06 |
| Journey     | direction    | Male   | 3.89 |      |
| Journey     | journey      | Female | 4.55 | 4.32 |
| Journey     | journey      | Male   | 3.99 |      |
| Journey     | path         | Female | 4.46 | 4.34 |
| Journey     | path         | Male   | 4.16 |      |
| Journey     | progress     | Female | 4.49 | 4.33 |
| Journey     | progress     | Male   | 4.10 |      |
| Journey     | road         | Female | 3.68 | 3.61 |
| Journey     | road         | Male   | 3.52 |      |
| Journey     | route        | Female | 4.00 | 3.98 |
| Journey     | route        | Male   | 3.94 |      |
| Journey     | travel       | Female | 4.33 | 4.25 |
| Journey     | travel       | Male   | 4.14 |      |
| Journey     | trip         | Female | 4.26 | 4.16 |
| Journey     | trip         | Male   | 4.02 |      |
| Journey     | way          | Female | 4.23 | 4.19 |
| Journey     | way          | Male   | 4.13 |      |
| Plant       | blossom      | Female | 5.57 | 5.55 |

|       |           |        |      |      |
|-------|-----------|--------|------|------|
| Plant | blossom   | Male   | 5.51 |      |
| Plant | cultivate | Female | 4.96 | 4.85 |
| Plant | cultivate | Male   | 4.71 |      |
| Plant | fertilize | Female | 5.01 | 5.00 |
| Plant | fertilize | Male   | 4.98 |      |
| Plant | fruit     | Female | 5.53 | 5.44 |
| Plant | fruit     | Male   | 5.32 |      |
| Plant | harvest   | Female | 4.76 | 4.63 |
| Plant | harvest   | Male   | 4.45 |      |
| Plant | plant     | Female | 5.21 | 5.23 |
| Plant | plant     | Male   | 5.26 |      |
| Plant | reap      | Female | 4.28 | 4.17 |
| Plant | reap      | Male   | 4.01 |      |
| Plant | root      | Female | 4.30 | 4.28 |
| Plant | root      | Male   | 4.25 |      |
| Plant | seed      | Female | 4.36 | 4.39 |
| Plant | seed      | Male   | 4.43 |      |
| Plant | sprout    | Female | 5.17 | 5.09 |
| Plant | sprout    | Male   | 4.97 |      |
